# Supplementary material for: Accessing and Assessing the Cell-Surface Glycocalyx Using DNA Origami
Source: PubMed Central journal article supplement — Nano Lett. 2021 May 25;21(11):4765–73. doi: 10.1021/acs.nanolett.1c01236 (PMC8193633; doi:10.1021/acs.nanolett.1c01236), 2021-05-25
Supplement: nl1c01236_si_001.pdf [file nl1c01236_si_001.pdf]

# Supplementary Information

## Accessing and Assessing the Cell-Surface

### Glycocalyx Using DNA Origami

*Piyumi Wijesekara<sup>\*,1</sup>, Ying Liu<sup>\*,2</sup>, Weitao Wang<sup>2</sup>, Elizabeth K. Johnston<sup>1</sup>, Mara L. G. Sullivan<sup>3</sup>,*

*Rebecca E. Taylor<sup>\*,1,2,4</sup>, Xi Ren<sup>\*,1,2</sup>*

<sup>1</sup> Department of Biomedical Engineering, Carnegie Mellon University, 5000 Forbes Avenue,  
Pittsburgh, Pennsylvania, United States.

<sup>2</sup> Department of Mechanical Engineering, Carnegie Mellon University, 5000 Forbes Avenue,  
Pittsburgh, Pennsylvania, United States.

<sup>3</sup> Center for Biologic Imaging, University of Pittsburgh, 3500 Terrace Street, Pittsburgh,  
Pennsylvania, United States.

<sup>4</sup> Department of Electrical and Computer Engineering, Carnegie Mellon University, 5000 Forbes  
Avenue, Pittsburgh, Pennsylvania, United States.

List of Supplementary Information:

Supplementary Figure 1. Schematics of the cadnano design for the DNA origami nanotile.

Supplementary Figure 2. Analysis of defective origami nanotile percentage in AFM images

Supplementary Figure 3. Agarose gel electrophoresis analysis of DNA origami nanotiles stability in (a) PBS with calcium and magnesium and (b) Endothelial Cell Growth Media (EGM2) over time.

Supplementary Figure 4. Incorporation of azide ligands onto the glycocalyx.

Supplementary Figure 5. Assessment of the synthesized 5'DBCO-ssDNA using a click shift assay and DNA gel electrophoresis.

Supplementary Figure 6. AFM characterization of DNA origami nanotiles with different configurations.

Supplementary Figure 7. Agarose gel electrophoresis analysis of DNA origami nanotiles with different configurations.

Supplementary Figure 8. Targeting DNA nanotiles to Chinese hamster ovaries (CHO) cells.

Supplementary Figure 9. Targeting DNA nanotiles to adenocarcinomic human alveolar basal epithelial (A549) cells.

Supplementary Figure 10. TEM images of neuraminidase-treated HUVECs.

Supplementary Figure 11. Targeting DNA nanotiles with 80-bp bridge to glycocalyx-anchored ssDNA initiators at different temperatures.

Supplementary Figure 12. Targeting DNA nanotiles with 80-bp bridge to PLB-anchored ssDNA initiators at different temperatures.

Supplementary Table 1. Reagents

Supplementary Table 2. Equipment

Supplementary Table 3. List of DNA sequences for cell-surface targeting

Supplementary Table 4. List of DNA sequences for assembly of origami nanotiles

Materials and Methods

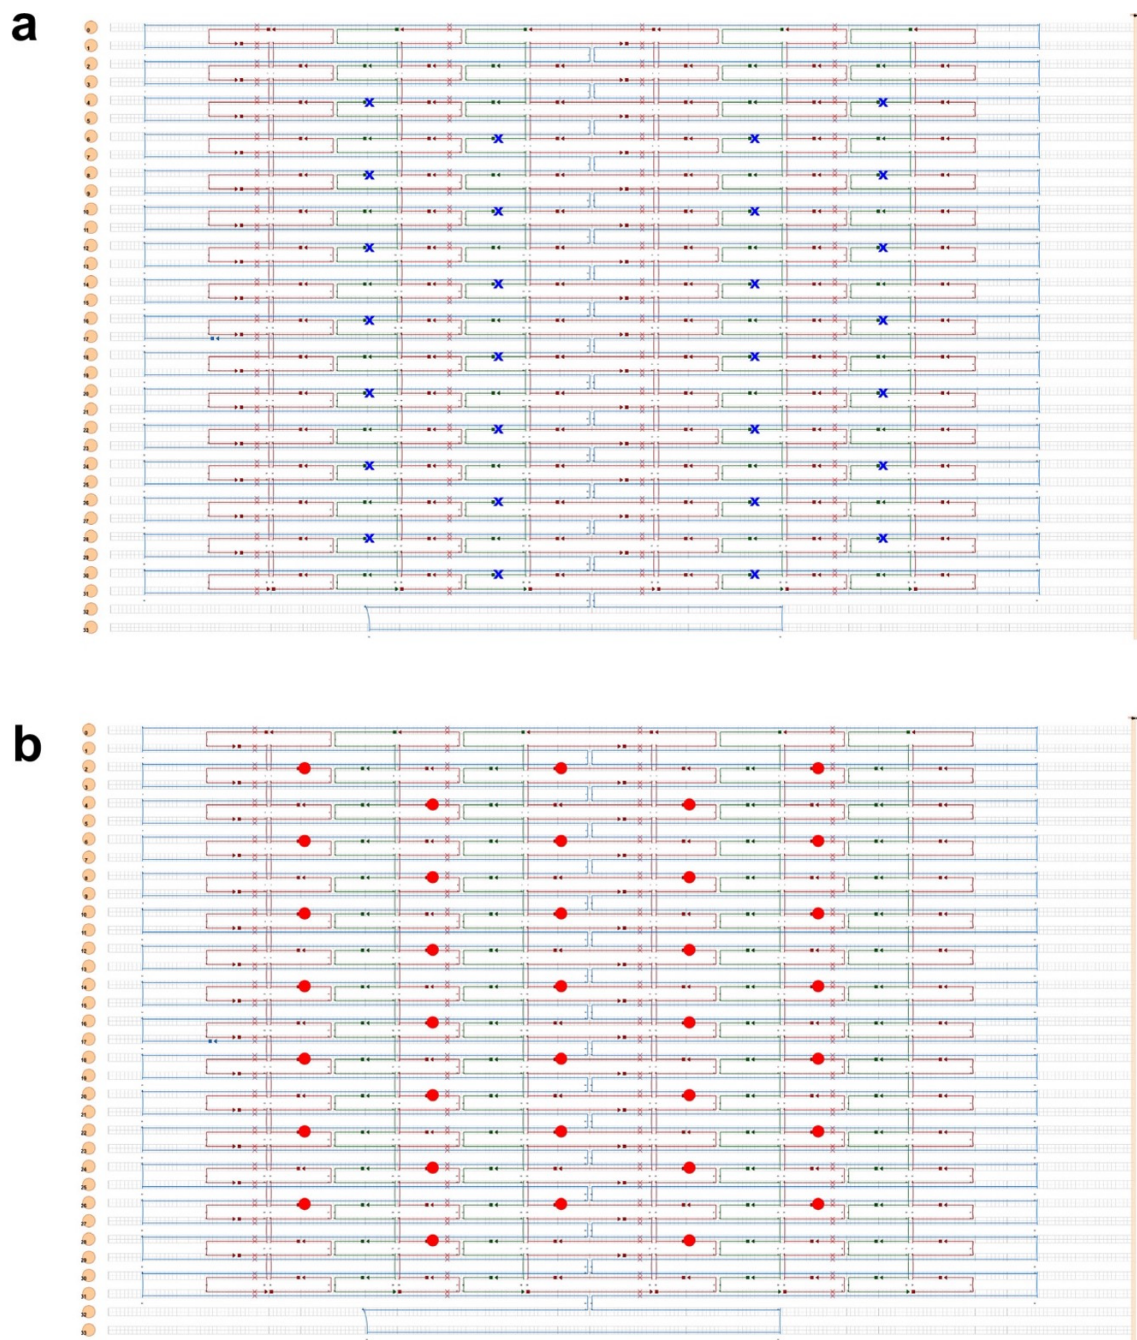

Supplementary Figure 1. Schematics of the cadnano design for the DNA origami nanotile. a, The blue crosses indicate positions of the 28 ssDNA-comp overhangs on the top surface of the fully decorated nanotile. b, The red dots indicate positions of the 35 biotin tags on the bottom surface of the nanotile.

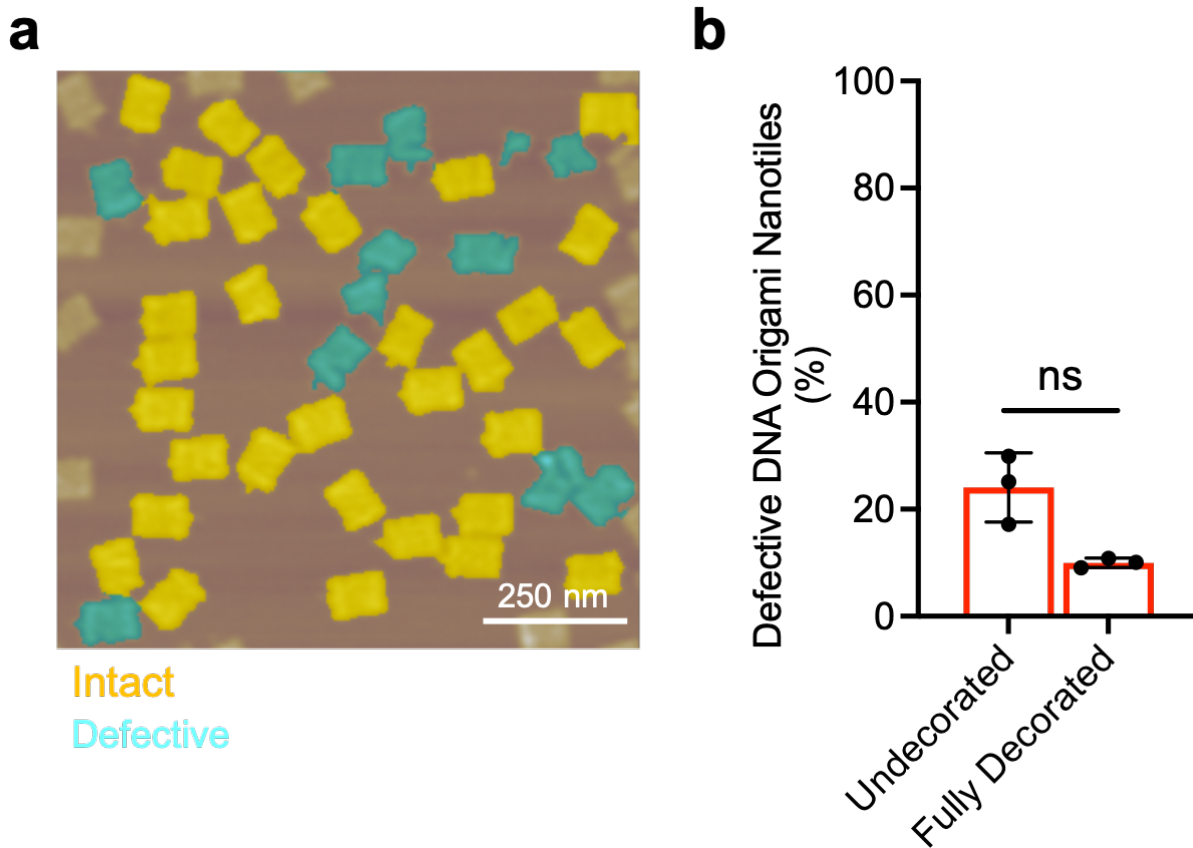

Supplementary Figure 2. Analysis of defective origami nanotile percentage in AFM images. a, intact and defective nanotiles were selected using the Yield Calculator<sup>1</sup> to quantify the yield of intact objects in AFM images. The nanotiles located at the edge of an image and not fully visible were excluded from the analysis. b, Three AFM images of undecorated or fully decorated nanotiles were used to calculate the average defective nanotiles percentage. These quantitative results indicate 24%±6.4 defective percentage in undecorated nanotiles and 10%±0.90 defective percentage in fully decorated nanotiles. Data represent means ± s.d. from three independent replicates.

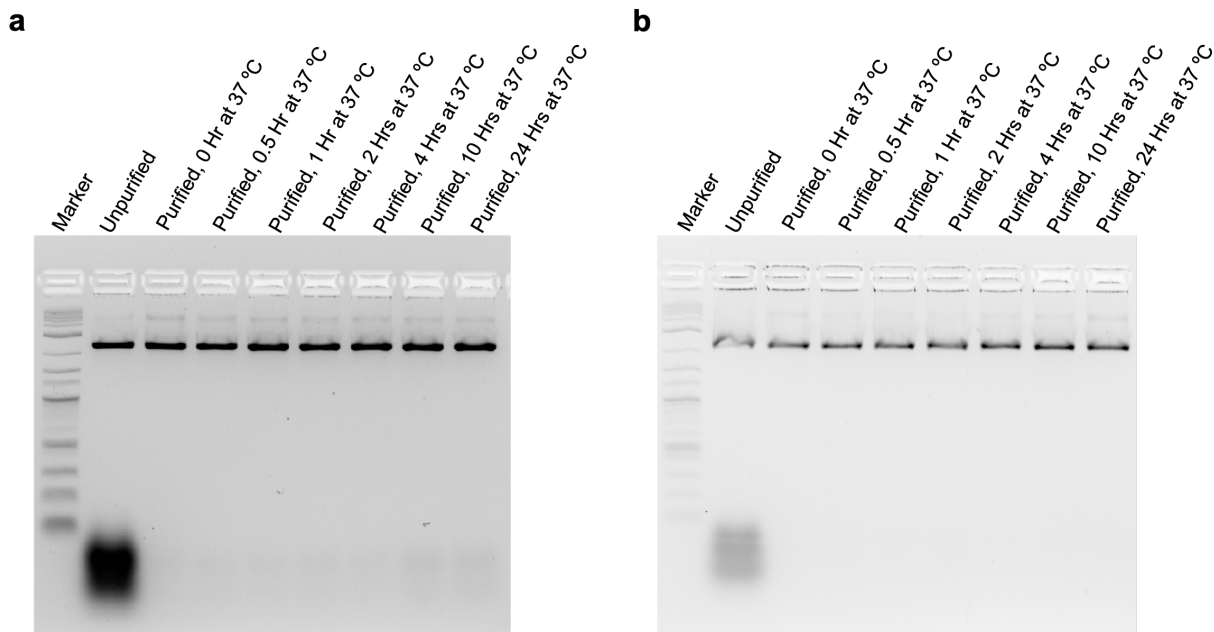

Supplementary Figure 3. Agarose gel electrophoresis analysis of DNA origami nanotiles stability in (a) PBS (with calcium and magnesium) and (b) Endothelial Cell Growth Media (EGM2) over time. Gel analysis of unpurified DNA origami nanotiles with 35 biotin decorations and 6 ssDNA-comp or purified DNA origami nanotiles with 35 biotin decorations and 6 ssDNA-comp, and incubated at 37 °C for 0, 0.5, 1, 2, 4, 10, and 24 hours (Hrs).

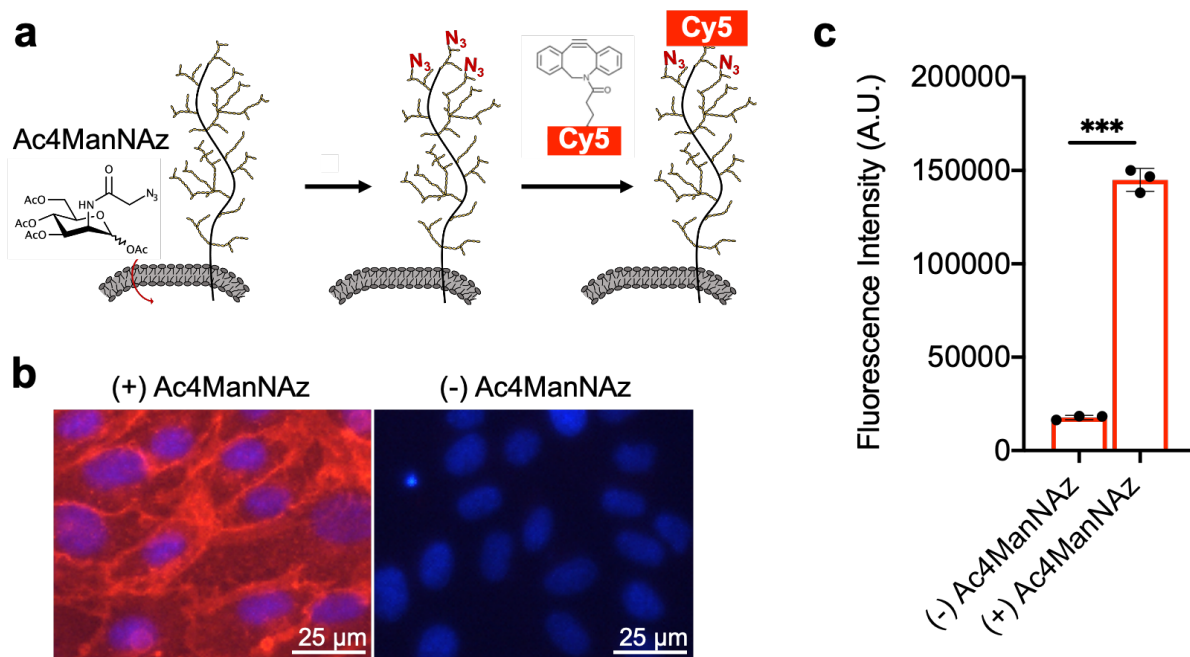

Supplementary Figure 4. Incorporation of azide ligands onto the glycocalyx. a, Azide ligands were incorporated covalently onto the glycocalyx via metabolic glycan labeling using azido monosaccharide, N-azidoacetylmannosamine-tetraacetylated (Ac4ManNAz), for 1 day. Cell-surface azide ligands were then incubated with DBCO bearing a Cy5 fluorescence tag (Cy5-DBCO) to allow Cy5 conjugation to potential azide ligands via the DBCO-to-azide click reaction. b,c Fluorescence imaging and quantification indicated that Ac4ManNAz generated robust metabolic azide labeling compared to the control, where no Ac4ManNAz was introduced. Data represent means  $\pm$  s.d. from three independent replicates. \*\*\*  $P \leq 0.001$ .

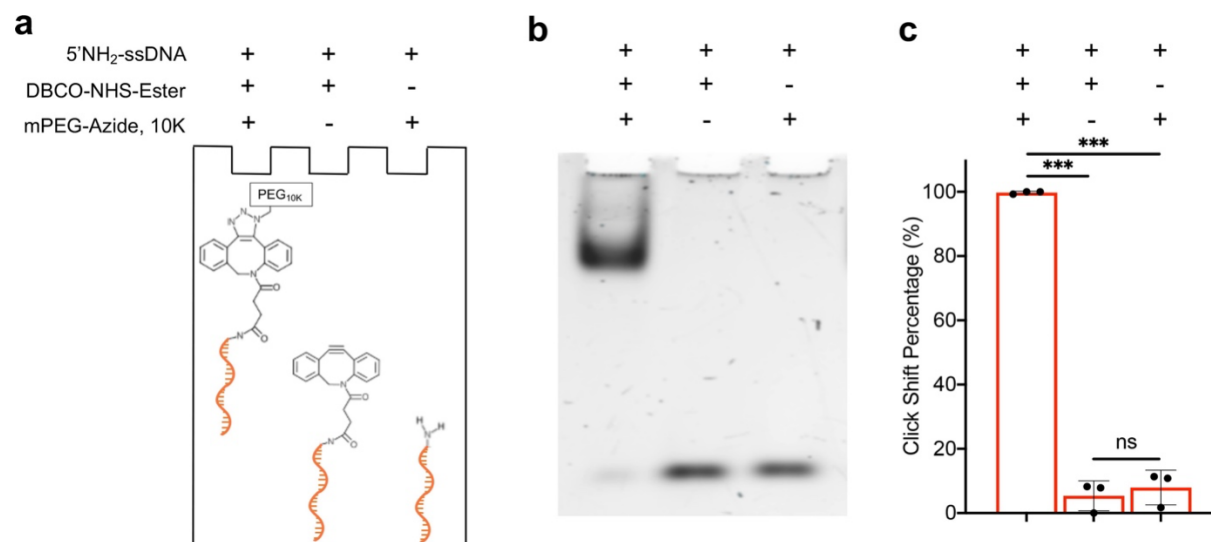

Supplementary Figure 5. Assessment of the synthesized 5' DBCO-ssDNA using a click shift assay and DNA gel electrophoresis. a, In the click shift assay, 5' DBCO-ssDNA was conjugated to PEG-azide (10 kDa) via the DBCO-to-azide click reaction, which is expected to lead to increased molecular weight and reduced mobility in gel electrophoresis. b, 5' DBCO-ssDNA and 5' NH<sub>2</sub>-ssDNA (control without DBCO) were incubated with PEG-azide (10 kDa) overnight and analyzed by the click shift assay. c, The percentage of click shift was quantified by normalizing the intensity of shifted (high molecular weight) band by the total intensity of the shifted and non-shifted (low molecular weight) bands. Data represent means  $\pm$  s.d. from three independent replicates. \*\*\* $P \leq 0.001$ .



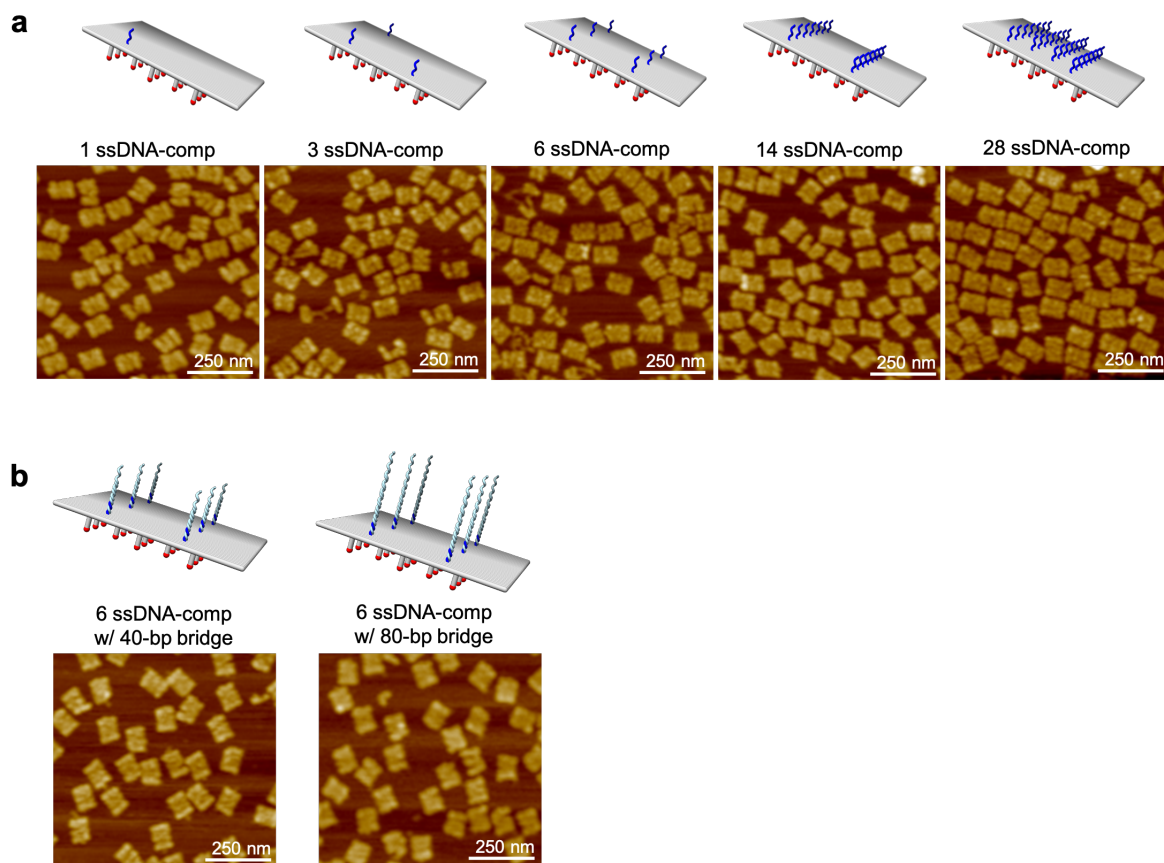

Supplementary Figure 6. AFM characterization of DNA origami nanotiles with different configurations. a, AFM images of nanotiles with 35 biotin decorations and 1, 3, 6, 14, or 28 ssDNA-comp overhangs. b, AFM images of nanotiles with 35 biotin decorations and 6 ssDNA-comp overhangs bearing 40-bp or 80-bp bridges.

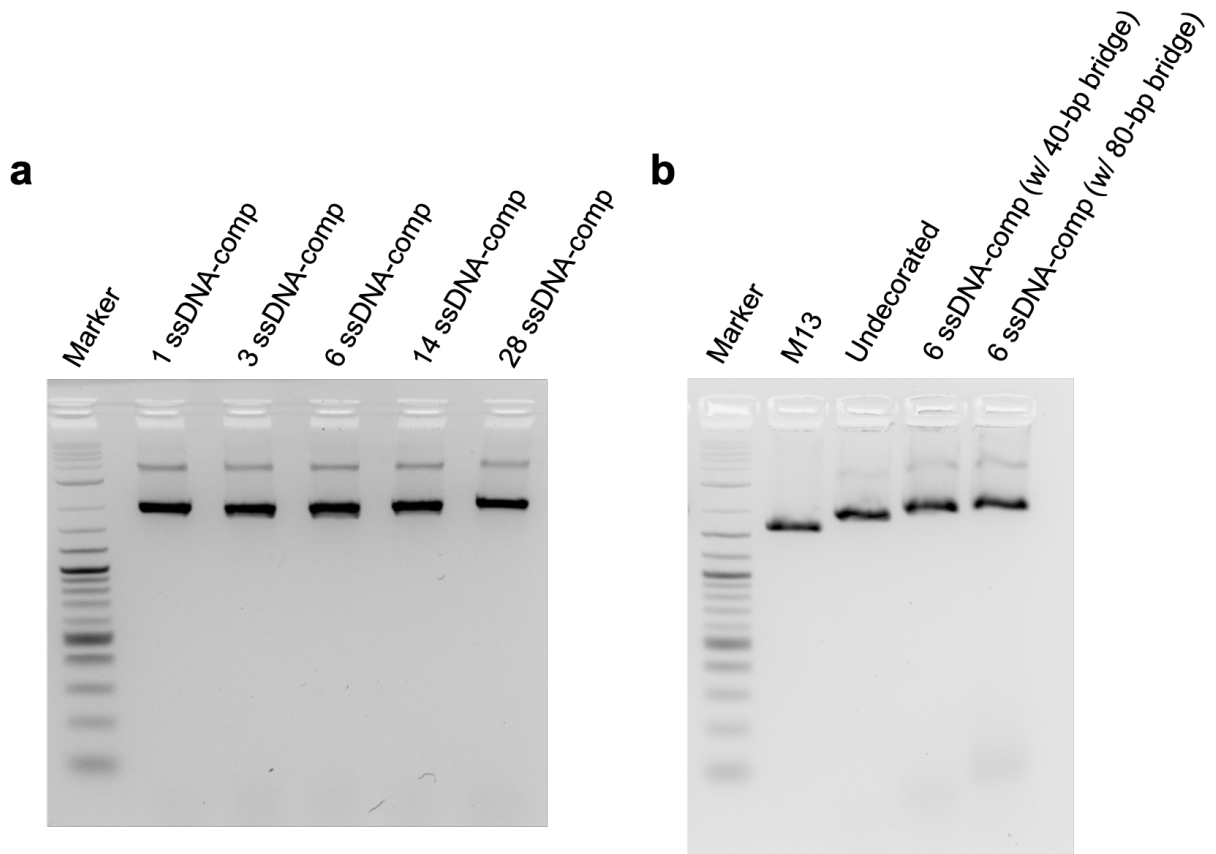

Supplementary Figure 7. Agarose gel electrophoresis analysis of DNA origami nanotiles with different configurations. a, Gel electrophoresis analysis of nanotiles with 35 biotin decorations and 1, 3, 6, 14, or 28 ssDNA-comp overhangs. b, Gel analysis of M13 scaffold, undecorated DNA origami nanotile, and nanotiles with 35 biotin decorations and 6 ssDNA-comp overhangs bearing 40-bp or 80-bp bridges. Marker is 2-log DNA ladder.

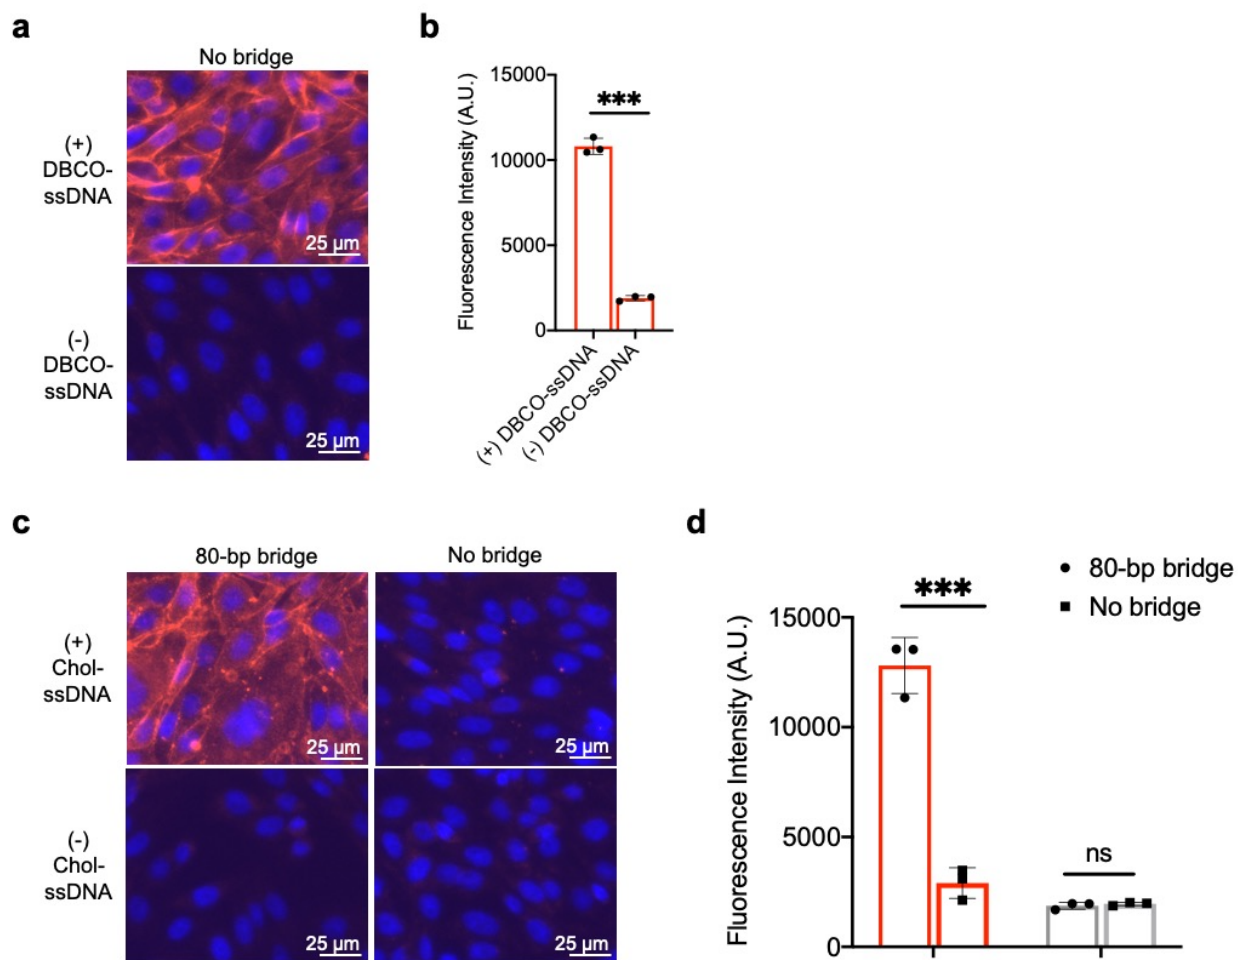

Supplementary Figure 8. Targeting DNA nanotiles to CHO cells. a,b, DBCO-ssDNA initiators were anchored onto the glycocalyx via biorthogonal glycocalyx labeling and copper-free click chemistry. The DNA nanotiles were then targeted to glycocalyx-anchored ssDNA initiators without the DNA duplex bridge. c,d, 5'Chol-ssDNA initiators were anchored onto the PLB via hydrophobic interaction and used to target DNA nanotiles bearing ssDNA-comp overhangs with 80-bp bridge or no bridge. Targeted nanotile immobilization, via glycocalyx or PLB anchored ssDNA initiators, was quantified through fluorescence intensity of biotin staining using fluorophore-conjugated streptavidin. In b and d, data represent means  $\pm$  s.d. from three independent replicates.

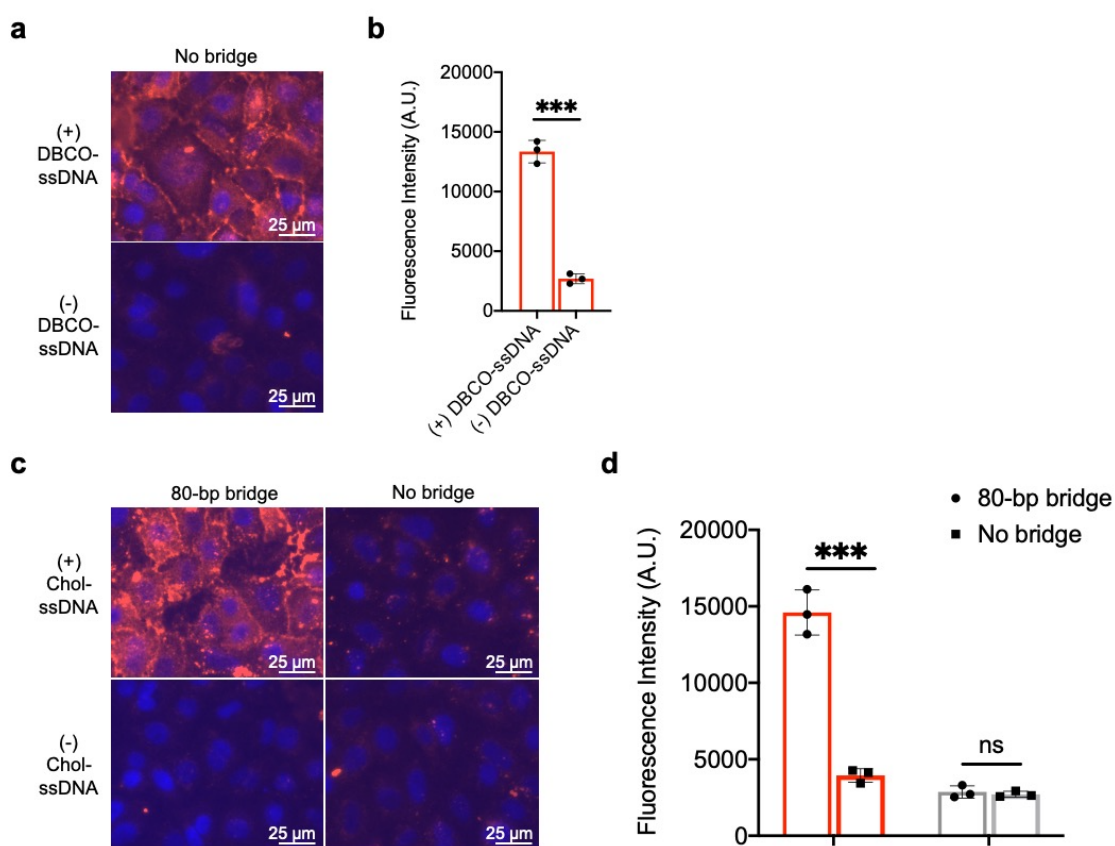

Supplementary Figure 9. Targeting DNA nanotiles to A549 cells. a,b, The DNA nanotiles were then targeted to the epithelial cell glycocalyx via glycocalyx-anchored DBCO-ssDNA initiators without the DNA duplex bridge. c,d, DNA nanotiles with 80-bp bridge or no bridge were targeted to the PLB via PLB-anchored 5'Chol-ssDNA initiators. Cell surface nanotile immobilization was quantified through fluorescence intensity of biotin staining using fluorophore-conjugated streptavidin. In b and d, data represent means  $\pm$  s.d. from three independent replicates.

**a**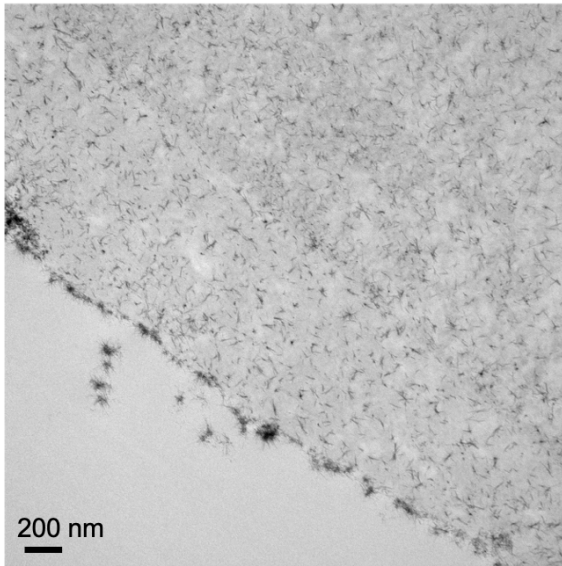**b**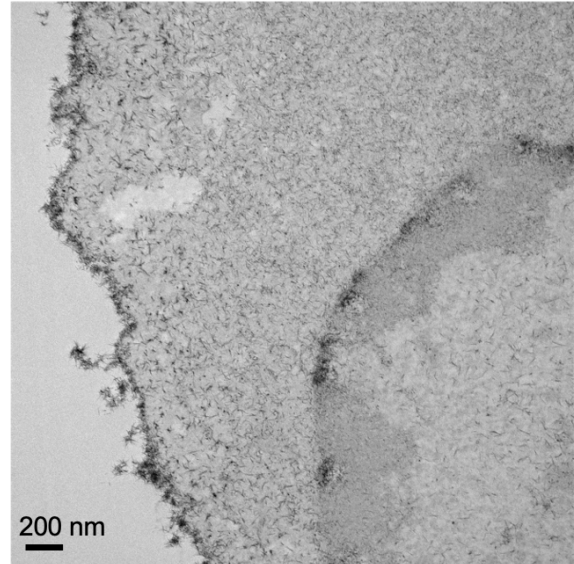

Supplementary Figure 10. TEM images of neuraminidase-treated HUVECs. a, HUVECs pre-treated with 1 U/mL neuraminidase for 1 hour. b, HUVECs not pre-treated with neuraminidase were used as control (b). Data represent means  $\pm$  s.d. from three independent replicates. \*  $P \leq 0.05$ , \*\*  $P \leq 0.01$ .

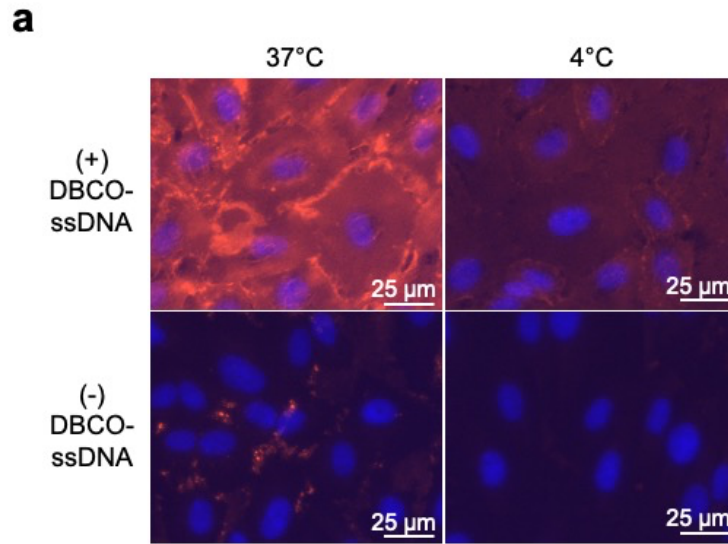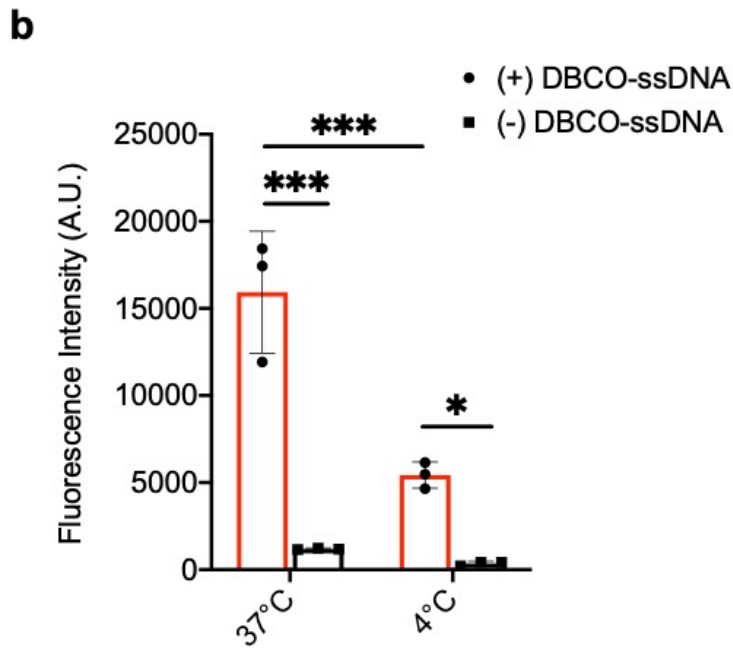

Supplementary Fig. 11. Targeting DNA nanotiles with 80-bp bridge to glyocalyx-anchored ssDNA initiators at different temperatures. DNA nanotiles with 80-bp bridge were targeted to HUVECs via glyocalyx-anchored ssDNA initiators at 37 °C and 4 °C. Cell surface nanotile immobilization was quantified through fluorescence intensity of fluorophore-labeled streptavidin that is conjugated to biotin in the nanotiles. In b, data represent means  $\pm$  s.d. from three independent replicates.

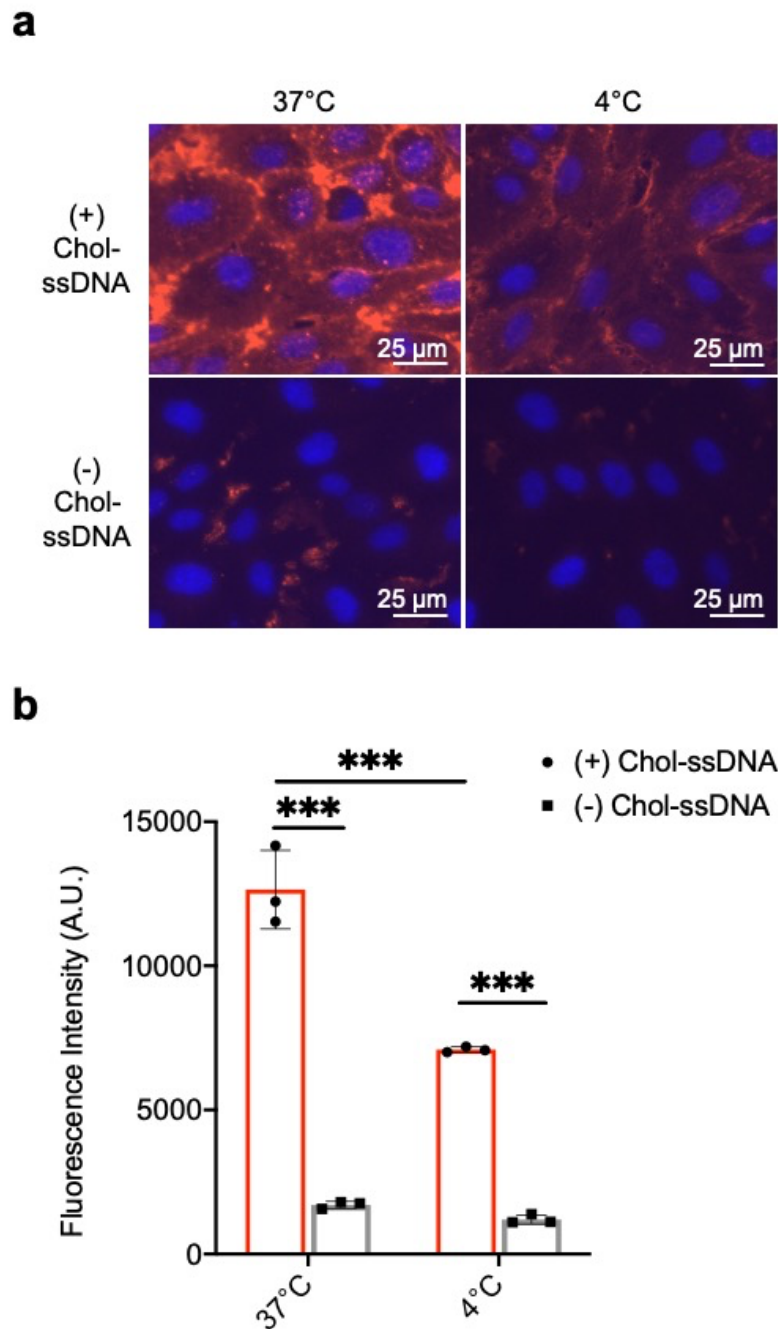

Supplementary Fig. 12. Targeting DNA nanotiles with 80-bp bridge to PLB-anchored ssDNA initiators at different temperatures. DNA nanotiles with 80-bp bridge were targeted to HUVECs via PLB-anchored ssDNA initiators at 37 °C and 4 °C. Cell surface nanotile immobilization was quantified through fluorescence intensity of fluorophore-labeled streptavidin that is conjugated to biotin in the nanotiles. In b, data represent means  $\pm$  s.d. from three independent replicates.

Supplementary Table 1. Reagents

| Name                                        | Source                          | Catalog No.    |
|---------------------------------------------|---------------------------------|----------------|
| Acetic acid                                 | Fisher Chemical                 | A491-212       |
| AFM tips                                    | NanoAndMore                     | HQ:NSC15/AL BS |
| Agarose, LE                                 | GenMate                         | E-3120-500     |
| Amicon Ultra Centrifugal Filter Units       | Millipore                       | UFC5003BK      |
| Boric Acid                                  | Fisher Chemical                 | A73-500        |
| Bovine Serum Albumin                        | Fisher BioReagents              | BP9706-100     |
| DBCO-Cy5                                    | Sigma-Aldrich                   | 777374-5MG     |
| DBCO-Sulfo-NHS-Ester                        | Sigma-Aldrich                   | 762040         |
| Dulbecco's Phosphate-Buffered Saline (DPBS) | Corning                         | 21-031-CV      |
| DPBS with calcium and magnesium             | Corning                         | 21-030-CV      |
| EDTA                                        | VWR                             | 0105-1KG       |
| Endothelial Cell Growth Medium-2 BulletKit  | Lonza                           | CC-3162        |
| Gelatin                                     | Sigma-Aldrich                   | G1890-100GA    |
| Hoechst 33258                               | ThermoFisher Scientific         | H3569          |
| Human Umbilical Vein Endothelial Cells      | Lonza                           | C2519A         |
| Hyclone FetalClone 1 Serum (U.S)            | GE Healthcare                   | SH30080.03     |
| Magnesium Chloride                          | VWR                             | J364-1KG       |
| Mini-PROTEAN TBE Precast Gels               | Bio-Rad                         | 4565013        |
| Neuraminidase, Purified                     | Worthington Biochemical Company | LS004759       |



|                                         |                     |              |
|-----------------------------------------|---------------------|--------------|
| Paraformaldehyde                        | Sigma-Aldrich       | P6148-500G   |
| PEG 8000                                | Sigma-Aldrich       | 89510-250G-F |
| Quick-Load 1 kb Plus DNA Ladder         | New England Biolabs | N0469S       |
| RPMI1640                                | Corning             | 10-040-CV    |
| Sodium Chloride                         | Sigma-Aldrich       | S3014-500G   |
| Streptavidin, Alexa Fluor 488 Conjugate | Invitrogen          | S32354       |
| Streptavidin, Alexa Fluor 647 conjugate | Invitrogen          | S32357       |
| SYBR Safe DNA gel stain                 | Invitrogen          | S33102       |
| TRIS                                    | VWR                 | 0826-1KG     |
| Trypsin-EDTA (0.25%)                    | Gibco               | 25200056     |
| 10X TBE                                 | Fisher BioReagents  | BP13334      |

Supplementary Table 2. Equipment

| Name                          | Source                             | Catalog No. |
|-------------------------------|------------------------------------|-------------|
| ChemiDoc Imaging System       | Bio-Rad                            | 12003154    |
| EVOS FL Auto 2 Imaging System | Thermo Fisher Scientific           | AMAFD2000   |
| MiniAmp Plus Thermal Cycle    | Applied Biosystems                 | A37029      |
| MFP-3D-BIO AFM                | Asylum Research Oxford Instruments | MFP-3D-BIO  |
| SpectraMax                    | Molecular Devices                  | i3X         |
| Thermal Cycler                | Bio-Rad                            | C1000 Touch |

Supplementary Table 3. List of DNA sequences for cell-surface targeting

(Synthesized by Integrated DNA Technologies)

| Name                                                                                | Sequence                                                                                                                                                                                                                                                              |
|-------------------------------------------------------------------------------------|-----------------------------------------------------------------------------------------------------------------------------------------------------------------------------------------------------------------------------------------------------------------------|
| 5'NH <sub>2</sub> -ssDNA                                                            | 5'-/5AmMC6/ACTG ACTG ACTG ACTG ACTG/-3'                                                                                                                                                                                                                               |
| 5'NH <sub>2</sub> -ssDNA(bridge)                                                    | 5'-/5AmMC6/TTGT CTCG TCGT CTAC CGCA AT/-3'                                                                                                                                                                                                                            |
| 5'NH <sub>2</sub> -ssDNA-comp<br>(complementary to ssDNA)                           | 5'-/5AmMC6/CAGT CAGT CAGT CAGT CAGT/-3'                                                                                                                                                                                                                               |
| 5'FAM-ssDNA-comp                                                                    | 5'-/6FAM/CAGT CAGT CAGT CAGT CAGT/-3'                                                                                                                                                                                                                                 |
| 5'Chol-ssDNA                                                                        | 5'-/Chol-TEG/ACTG ACTG ACTG ACTG ACTG/-3'                                                                                                                                                                                                                             |
| 5'Chol-ssDNA(bridge)                                                                | 5'-/Chol-TEG/TTGT CTCG TCGT CTAC CGCA AT/-3'                                                                                                                                                                                                                          |
| 5'Chol-ssDNA-comp                                                                   | 5'-/Chol-TEG /CAGT CAGT CAGT CAGT CAGT/-3'                                                                                                                                                                                                                            |
| 40-bp bridge, with both ends complementary to ssDNA and ssDNA(bridge), respectively | Annealed from the following two oligos:<br>5'-/GTCC TTAC ACAG AGGC TTGA ATTG CGGT AGAC GACG AGAC/-3'<br>5'-/TCAA GCCT CTGT GTAA GGAC CAGT CAGT CAGT CAGT CAGT/-3'                                                                                                     |
| 80-bp bridge, with both ends complementary to ssDNA and ssDNA(bridge), respectively | Annealed from the following two oligos:<br>5'-/CAGG AATG TGTC TCCG AACT GGTG CTAG TACA ACCT GCCT GAGG TGAA CGAA TATC ACTG ATTG CGGT AGAC GACG AGAC/-3'<br>5'-/CAGT GATA TTCG TTCA CCTC AGGC AGGT TGTA CTAG CACC AGTT CGGA GACA CATT CCTG CAGT CAGT CAGT CAGT CAGT/-3' |

## Materials and Methods

Detailed information regarding all materials used in this study was described in Supplementary Tables: reagents (Supplementary Table 1), equipment (Supplementary Table 2), DNA sequences for cell-surface targeting (Supplementary Table 3), and DNA sequences for assembly of origami nanotiles (Supplementary Table 4).

### Self-assembly of DNA origami nanotiles

DNA nanotiles were folded from M13mp18 scaffold together with 192 staple strands. For annealing, 10 nM of the scaffold and 50 nM of the staples were mixed in 1x TAE buffer with 12.5 mM MgCl<sub>2</sub>. The biotin-labeled strands were added pre-annealing at a final concentration of 3  $\mu$ M. The mixture was heated to 95°C and gradually cooled down to 4°C within 4 hours. The detailed annealing ramp was as the following: 90°C, 5 minutes; 90°C-70°C, 1°C per minute; 70°C-45°C, 0.2 °C per minute; 45°C-30°C, 1°C per minute; and 30°C-4°C, 2°C per minute.

### PEG purification of DNA nanotiles

Following annealing, DNA nanotiles were precipitated in PBS with 7.5% polyethylene glycol (PEG), 12.5 mM MgCl<sub>2</sub>, 255 mM NaCl, 22.5 mM Tris, 10 mM acetic acid, and 1 mM EDTA. The supernatant was removed, and the pellet was resuspended in DPBS with 12.5 mM MgCl<sub>2</sub> to a final concentration of 50 ng/ $\mu$ L.

### Agarose gel electrophoreses

Agarose gel electrophoreses of DNA nanotiles were performed with 2% agarose gel in TBE buffer with 12.5 mM MgCl<sub>2</sub> at 100 V and room temperature (RT) for 2 hours. 20  $\mu$ L of 20 nM

samples were loaded into each well. Following electrophoresis, the gel was stained with SYBR Safe DNA gel stain and imaged with the ChemiDoc Imaging System.

#### Atomic force microscopy (AFM)

10  $\mu$ L of 2 nM origami structures in DPBS with 12.5 mM MgCl<sub>2</sub> was deposited onto a freshly cleaved mica surface, incubated at RT in a humid chamber for 5 minutes, and blow-dried with nitrogen. The sample was washed twice with 20  $\mu$ L DI water and thoroughly blow-dried with nitrogen before imaging. AFM scans of nanotiles were performed using MFP-3D-BIO AFM with a 5-nm AFM tip in the tapping mode. The quality and integrity of nanotiles were assessed using their AFM images and the Yield Calculator.<sup>1</sup>

#### Synthesis of 5'DBCO-modified oligos

The 5'NH<sub>2</sub>-ssDNA, 5'NH<sub>2</sub>-ssDNA-comp, and 5'NH<sub>2</sub>-ssDNA(bridge) oligos were incubated overnight in DPBS with DBCO-sulfo-n-hydroxysuccinimidyl ester (DBCO-Sulfo-NHS-Ester) at a 1:10 molar ratio under agitation at RT. This allowed NH<sub>2</sub>-to-NHS conjugation, giving rise to 5'DBCO-ssDNA, 5'DBCO-ssDNA-comp, and 5'DBCO-ssDNA(bridge). Following overnight incubation, the reaction mixture was dialyzed five times against DPBS using Amicon Ultra Centrifugal filters (molecular weight cut-off, 3 kDa) to remove unconjugated DBCO-Sulfo-NHS-Ester. The above-described conjugation and purification procedures were repeated once again to increase the conjugation efficiency. The final concentration of 5'DBCO-modified oligos was adjusted to 500  $\mu$ M with DPBS.

#### Click-shift assay of 5'DBCO-ssDNA

The 5'DBC0-ssDNA was diluted to 10  $\mu$ M in DPBS and reacted with 100  $\mu$ M PEG-azide (molecular weight, 10 kDa) overnight at RT. The resulting reaction mixture was analyzed via DNA gel electrophoresis along with controls of 5'NH<sub>2</sub>-ssDNA that has only been incubated with DBCO-Sulfo-NHS-Ester or PEG-azide. The gel was stained with SYBR Safe DNA gel stain and imaged with the ChemiDoc Imaging System.

## Cell Culture

Human umbilical vein endothelial cells (HUVECs) were purchased from the Lonza and have been tested negative for mycoplasma contamination. Cells were cultured in Endothelial Cell Growth Medium-2 (EGM-2) at 37°C with 5% CO<sub>2</sub>. HUVECs of passage 3-5 were plated into 96-well culture plates at a density of 40,000 cells per well, one day prior to the experiment.

## Metabolic labeling of the cell surface with azide ligands

Azido monosaccharide, N-azidoacetylmannosamine-tetraacylated (Ac<sub>4</sub>ManNAz, stock in DMSO) was diluted in culture medium to a final concentration of 50  $\mu$ M and administered to cells for two days. DMSO (0.1%) diluted in culture medium was administered to control cell groups. Cell surface azide incorporation was visualized by its conjugation with azide-reactive, fluorescent Cy5-DBC0, and was imaged using the SpectraMax i3X Multi-Mode Microplate Reader and EVOS FL Auto 2 Cell Imaging System.

## Anchorage of ssDNA onto the glycocalyx

The cells, metabolically labeled with azide ligands, were first stained with Hoechst 33258 (1  $\mu$ g/mL in culture medium for 30 minutes) to label cell nuclei. Next, cells were incubated with 5'DBC0-ssDNA at 50  $\mu$ M in DPBS (with Ca<sup>2+</sup> and Mg<sup>2+</sup>) for 1 hour at 37°C to allow DBCO-

to-azide click conjugation. Cells incubated in DPBS (with Ca<sup>2+</sup> and Mg<sup>2+</sup>), but without 5'DBCO-ssDNA, were used as a control. To examine ssDNA immobilization on the glycocalyx, cells were further incubated with complementary ssDNA oligos with a 5'FAM fluorescent tag (5'FAM-ssDNA-comp) at 1 μM in DPBS (with Ca<sup>2+</sup> and Mg<sup>2+</sup>) for 30 minutes. Cells were imaged using the EVOS System.

#### Targeting DNA nanotiles to ssDNA initiators anchored on the glycocalyx

Cells with ssDNA immobilized on their glycocalyx were incubated with DNA nanotiles bearing biotin tags and complementary ssDNA-comp overhangs, diluted to 5nM in DPBS (with Ca<sup>2+</sup> and Mg<sup>2+</sup>), for 30 minutes at 37°C. Following washing off the unbound nanotiles, the cells were fixed with 4% paraformaldehyde (PFA) for 10 minutes. Cell-surface nanotiles were visualized by staining with Alexa Fluor 647-conjugate streptavidin in 1% BSA in DPBS (with Ca<sup>2+</sup> and Mg<sup>2+</sup>) for 30 minutes at RT and imaging with the EVOS System.

#### Anchorage of ssDNA to the phospholipid bilayer (PLB)

First, the cell nuclei were stained with Hoechst 33258. The 5'Chol-ssDNA was diluted to 0.5 μM in DPBS (with Ca<sup>2+</sup> and Mg<sup>2+</sup>) and administered to cells for 1 hour at 37°C. Cells incubated in DPBS (with Ca<sup>2+</sup> and Mg<sup>2+</sup>) without 5'Chol-ssDNA were used as a control. ssDNA immobilized on the PLB were visualized by further incubating the cells with the complementary 5'FAM-ssDNA-comp at 1 μM in DPBS (with Ca<sup>2+</sup> and Mg<sup>2+</sup>) for 30 minutes and imaging using the EVOS System.

#### Targeting DNA nanotiles to ssDNA initiators anchored on the PLB

ssDNA immobilized on the PLB were incubated with DNA nanotiles bearing ssDNA-comp overhangs with and without the further extension by the 40-bp or 80-bp bridges, diluted to 5 nM in DPBS (with Ca<sup>2+</sup> and Mg<sup>2+</sup>), for 1 hour at 37°C. The cells were fixed and the surface nanotiles were visualized via fluorescent streptavidin as described in the previous section.

#### Enzymatic digestion of glycocalyx proteins

Cells pre-stained with Hoechst 33258 were washed twice with 1 mM EDTA in DPBS and incubated with 2.5% trypsin for 30 minutes or 0.05% trypsin for 5 min. The trypsinized cells were neutralized and washed with DPBS (with Ca<sup>2+</sup> and Mg<sup>2+</sup>) prior to the sequential binding to 5'Chol-ssDNA and DNA nanotiles bearing complementary ssDNA-comp overhangs. Following nanotile binding, the cells were transferred to a 48-well plate for fluorescence imaging using the EVOS System.

#### Neuraminidase treatment of HUVECs

HUVECs were incubated with neuraminidase (dissolved in PBS) at 1 U/mL for 1 hour in Endothelial Cell Basal Medium-2 (EBM-2)<sup>2</sup>. The control HUVEC groups were incubated in EBM-2 (with respective volume of PBS added) alone without neuraminidase. The cells were then washed three times with PBS (with calcium and magnesium) before introduction of ssDNA initiators and DNA nanotiles.

#### Transmission electron microscopy

The cells were fixed with 2% glutaraldehyde, 2% sucrose, and 2% lanthanum nitrate in 0.1 mol/L sodium cacodylate buffer (pH 7.3) for 2 hours at room temperature and prepared for electron microscopy imaging according to the reported protocol<sup>3</sup>.



## DNA-guided multicellular assembly via cell-surface initiators

HUVECs were trypsinized into single-cell suspension. The two participating cell groups were fluorescently labeled with two different dyes: CellTracker Green CMFDA Dye (10  $\mu$ M in DPBS, supplemented with 1mM EDTA, for 30 minutes at 4°C) and CellTracker Deep Red Dye (1  $\mu$ M in DPBS, supplemented with 1mM EDTA, for 30 minutes at 4°C).

For assembly mediated by PLB-anchored initiators, the PLB of the red cell group was decorated with 5'Chol-ssDNA. The green cell group was further divided into two sub-groups. For direct assembly without the dsDNA bridge, the PLB of the green cells was decorated with 5'Chol-ssDNA-comp. For assembly with the dsDNA bridge, the PLB of the green cells was first decorated with 5'Chol-ssDNA(bridge) and then hybridized with an 80-bp bridge that carries ssDNA-comp at one end and ssDNA(bridge)-comp at the other end.

For assembly mediated by glycocalyx-anchored initiators, the glycocalyx of the red cell group was decorated with 5'DBCO-ssDNA. The green cell group was further divided into two sub-groups. For direct assembly without the dsDNA bridge, the PLB of the green cells was decorated with 5'DBCO-ssDNA-comp. For assembly with the dsDNA bridge, the PLB of the green cells was first decorated with 5'DBCO-ssDNA(bridge) and then hybridized with an 80-bp bridge that carries ssDNA-comp at one end and ssDNA(bridge)-comp at the other end.

For cell-to-cell assembly, red and green cells were mixed in a 0.2-mL microcentrifuge tube at a green-to-red cell ratio of 1:100 (10,000 cells/mL : 1,000,000 cells/mL), centrifuged at 10 g for 2 minutes and incubated on ice for an additional 10 minutes. Following assembly, cells were transferred into a 24-well plate for fluorescence imaging using the EVOS System.

Comparing cellular uptake of DNA nanotiles anchored on the glycocalyx versus the PLB

The ssDNA was immobilized onto the glycocalyx or PLB of Hoechst 33258 stained HUVECs. The cells were incubated with DNA nanotiles carrying ssDNA-comp overhangs with the 80-bp bridge for 30 minutes, 1 hour, or 2 hours. Cells were then fixed with PFA and stained with the Alexa Fluor 647-conjugated streptavidin for visualization of cell-surface nanotiles. Cells were then permeabilized with 0.5% Triton-X for 15 minutes at RT. The uptaken nanotiles were then visualized via incubation of the permeabilized cells with the Alexa Fluor 488-conjugated streptavidin in 1% BSA in DPBS (with  $\text{Ca}^{2+}$  and  $\text{Mg}^{2+}$ ) for 30 minutes at RT.

#### Quantitative image analysis of the uptaken DNA nanotiles

Image analysis for the quantification of cellular uptake of DNA nanotiles was performed using custom MATLAB codes. Images were manually selected in the Cy5 and GFP channels from all groups. For the GFP channel, uptaken signals were identified by constructing structuring elements and performing morphological transformations<sup>50-51</sup>. The images were then binarized using adaptive thresholding to further subtract the background noise<sup>4-7</sup>. The intensities of post-processed images were then calculated by measuring the intensity of all pixels. For the Cy5 channel, the intensity of each image was directly computed without post-processing.

#### Statistics

Quantitative data were displayed as means  $\pm$  s.d. Statistical significances were determined using one-way analysis of variance (ANOVA) with post-hoc Tukey's Test and unpaired t-test. Statistical analyses were performed using GraphPad.

#### References:

1. Tikhomirov, G.; Petersen, P.; Qian, L. *Nat Nanotechnol* **2017**, 12, (3), 251-259.

2. Barker, A. L.; Konopatskaya, O.; Neal, C. R.; Macpherson, J. V.; Whatmore, J. L.; Winlove, C. P.; Unwin, P. R.; Shore, A. C. *Observation and characterisation of the glycocalyx of viable human endothelial cells using confocal laser scanning* **2004**, 6, (5), 1006-1011.
3. Chappell, D.; Jacob, M.; Paul, O.; Rehm, M.; Welsch, U.; Stoeckelhuber, M.; Conzen, P.; Becker, B. F. *Circ Res* **2009**, 104, (11), 1313-7.
4. Narayanaswamy, N.; Chakraborty, K.; Saminathan, A.; Zeichner, E.; Leung, K.; Devany, J.; Krishnan, Y. *Nature Methods* **2019**, 16, (1), 95-102.
5. Sauvola, J.; Pietikäinen, M. *Pattern Recognition* **2000**, 33, (2), 225-236.
6. van den Boomgaard, R.; van Balen, R. *CVGIP: Graphical Models and Image Processing* **1992**, 54, (3), 252-258.
7. Veneziano, R.; Moyer, T. J.; Stone, M. B.; Wamhoff, E.-C.; Read, B. J.; Mukherjee, S.; Shepherd, T. R.; Das, J.; Schief, W. R.; Irvine, D. J.; Bathe, M. *Nature Nanotechnology* **2020**, 15, (8), 716-723.

**Supplementary Table 4. List of DNA sequences for assembly of origami nanotiles**

| Name      | Sequence                                                 | Note |
|-----------|----------------------------------------------------------|------|
| seam01    | TCAGGAGGTTTAGTACCGCCACCCTCAGAAC                          |      |
| seam02    | TTTGCTAAGTAAATGAATTTTCTGAGTGCCTT                         |      |
| seam03 S1 | GAGTAACAGTTTTAACGGGGTCTATGGGATTGAGAGCAGACCTGGAACCTCG     |      |
| seam04    | TAACCGATATGACAACAACCATCGCACACCCC                         |      |
| seam05    | TCAGAGCCGCCACCCTCAGAGCCCCACGCA                           |      |
| seam06    | CACTAAAATAAAAACGAAAGAGGCAACGTCACC                        |      |
| seam07 S1 | AATGAAATTAGCAAGGCCGGAAAAAGAATATTGAGAGCAGACCTGGAACCTCG    |      |
| seam08    | TGACCTTCTACAGACCAGGCGCATACCACGGA                         |      |
| seam09    | ATAAGTTAAGAAACGCAAAGACAGGCTGGC                           |      |
| seam10    | AAAATCTAATACCAGTCAGGACGTGCAAGAAA                         |      |
| seam11 S1 | CAATGAAAGCCCAATAATAAGATGGGAAGATTGAGAGCAGACCTGGAACCTCG    |      |
| seam12    | GGGGTAAATTTGCAAAAAGAAGTTAAATAAAC                         |      |
| seam13    | AGCCATAAATTTGCCAGTTACATGCCAGAG                           |      |
| seam14    | TTCGAGCTAAGACTTCAAAATCGATCGTAGG                          |      |
| seam15 S1 | AATCATTGCCGTTTTTATTTTCCGTTTTAATTGAGAGCAGACCTGGAACCTCG    |      |
| seam16    | AGTAGATTAGTTGATCCCAATTCCTTCTGTCC                         |      |
| seam17    | AGACGACCAAAAGGTAAAGTAATGCGAACG                           |      |
| seam18    | CCCTGTAATCGGTTGTACCAAAAAAAGGCGT                          |      |
| seam19 S1 | TAAATAACGACCGTGTGATAAACATTATGATTGAGAGCAGACCTGGAACCTCG    |      |
| seam20    | AGGCTATCTAGCTATTTTTGAGAGAAGACGCT                         |      |
| seam21    | GAGAAGAGCGATAGCTTAGATTATCTACAA                           |      |
| seam22    | ACGCCATCCAGCTCATTTTTAACAGGCGAAT                          |      |
| seam23 S1 | TATTCATTACAAAATCGCGCAGCAATAGGATTGAGAGCAGACCTGGAACCTCG    |      |
| seam24    | AGCTTCCCTCAGGAAGATCGCACATCAATA                           |      |
| seam25    | TAATCCTCAGATGATGGCAATTCTCCAGCC                           |      |
| seam26    | GGTCGACTCAGTGCCAAGCTTGCAGGAGCACT                         |      |
| seam27 S1 | AACAACCTTCTAAAATATCTTTATGCCTGCATTGAGAGCAGACCTGGAACCTCG   |      |
| seam28    | TTAATGAAGGGAACCTGTCGTGCATTAATAA                          |      |
| seam29    | TACCGAACCCATAAAACATCGCCCAGCTGCA                          |      |
| seam30    | CCCGAGATATCCCTTATAAATCAAAAACGCTC                         |      |
| seam31    | ATGGAAACCATTGCAACAGGAAAAAGAATAG                          |      |
| seam32    | GAGCTTGACGGGGAAAAAAGGGATTTAGAC                           |      |
| X01Y01    | TAGGAACCCATGTACACAACGCC                                  |      |
| X01Y02    | TGTAGCATAATTTTTTACGTTCCCTTAAT                            |      |
| X01Y03    | TGTATCGAGCGAAAGACAGCATTGAGGACT                           |      |
| X01Y04    | AAAGACTCATCGCCTGATAAATTTAGCCGG                           |      |
| X01Y05    | AACGAGGATTCAGTGAATAAGGTAAATTGG                           |      |
| X01Y06    | GCTTGAGTAGGAATACCACATTTTACGAGG                           |      |
| X01Y07    | CATAGTACCCCTCAAATGCTTTCAAAAATC                           |      |
| X01Y08    | AGGTCTTTCCTTTGATAAGAGCTGAATAT                            |      |
| X01Y09    | AATGCTGGGGCGCGAGCTGAAATTAACATC                           |      |
| X01Y10    | CAATAAATTTAAATGCAATGCCGAGAAAGG                           |      |
| X01Y11    | CCGGAGAATGTCAATCATATGTCAGGAAGA                           |      |
| X01Y12    | TTGTATAACAACCCGTCCGATTTGGGATAG                           |      |
| X01Y13    | GTCACGTTGGGAAGGGCGATCGGAAAGGGG                           |      |
| X01Y14    | GATGTGCAATTGTTATCCGCTCAAAGTGTA                           |      |
| X01Y15    | AAGCTGAGTGAGACGGGCAACGAGTTGCA                            |      |
| X01Y16    | GCAAGCGCAAAGGGCGAAAAACCATCACCCAAATCAA                    |      |
| X02Y01    | GCGAATAATTCCACAGACAGCCCTGGGATAGCAAGCCCAA                 |      |
| X02Y02 S1 | CCCTCAGCGTTTATCAGCTTGCTTAAGGAATTTGAGAGCAGACCTGGAACCTCG   |      |
| X02Y03    | ATTTGTATTTTTCATGAGGAAGTTGATCGTCA                         |      |
| X02Y04 S1 | AGCTGCTCCGCAGACGGTCAATCACAACGGAGTTGAGAGCAGACCTGGAACCTCG  |      |
| X02Y05    | TTGAGATTATGGTTTAATTTCAACCGTAACAA                         |      |
| X02Y06 S1 | ATTGAATCAGAGCAACACTATCATTTTCATCAGTTGAGAGCAGACCTGGAACCTCG |      |
| X02Y07    | TTAATTGCTACCCTGACTATTATAAAAATATTC                        |      |
| X02Y08 S1 | TTCAATTTGTAGCTCAACATGTTTTGAGTACCTTTGAGAGCAGACCTGGAACCTCG |      |
| X02Y09    | TCATATATTCATACAGGCAAGGCAGCTATATT                         |      |

|           |                                                         |                                  |
|-----------|---------------------------------------------------------|----------------------------------|
| X02Y10 S1 | AAACTAGCCAGTCAAATCACCATCTAGAACCCTTGAGAGCAGACCTGGAACCTCG |                                  |
| X02Y11    | AGCGAGTAAGCAAATATTTAAATTTAATCGTA                        |                                  |
| X02Y12 S1 | GCAACTGTTGGTGTAGATGGGCGCTAAATGTGTTGAGAGCAGACCTGGAACCTCG |                                  |
| X02Y13    | CTGTGTGATGCAAGGCGATTAAGTCAGGCTGC                        |                                  |
| X02Y14 S1 | TTTTACCGGGTGCCTAATGAGTGGCTGTTTCTTGAGAGCAGACCTGGAACCTCG  |                                  |
| X02Y15    | TCCAACGTGTCCACGCTGGTTGCGGTTTTTC                         |                                  |
| X02Y16    | GTTTTTTGGGGTCGAGACGTGGAC                                |                                  |
| X03Y01    | ACCACCCTCATTTTTACATAGTTAGCGTAACGTAGAAAGG                |                                  |
| X03Y02    | AACAACATCGAGGTGAATTTCTTAAGGCCGC                         | S2 stalk / bridge (via S3 stalk) |
| X03Y03    | TTTTGCGGTCCATTAACGGGTAAAGCGCGAA                         |                                  |
| X03Y04    | ACAAAGTATAAGGGAACCGAAGTGTATTACC                         | S2 stalk                         |
| X03Y05    | CAAATCAATTTAATCATTGTGAATATTACAGG                        |                                  |
| X03Y06    | TAGAAAGAAACCCTCGTTTACCAGACTGCGGA                        | S2 stalk                         |
| X03Y07    | ATCGTCATGTCAGAAGCAAAGCGGACAGGTCA                        |                                  |
| X03Y08    | GGATTAGAAAATATGCAACTAAAGGTCAATAA                        | S2 stalk / bridge (via S3 stalk) |
| X03Y09    | CCTGTTTTAAAGAATTAGCAAAATCAAGGATA                        |                                  |
| X03Y10    | AAAATTTAATATGATATTCACCCGAGAATCG                         | S2 stalk                         |
| X03Y11    | ATGAACGGGTAAACGTTAATATTTTCAGCTTTC                       |                                  |
| X03Y12    | ATCAACATATCGTAACCGTGCATCAGCGCCAT                        | S2 stalk                         |
| X03Y13    | TCGCCATTTGGGTAACGCCAGGGTCGTAATCA                        |                                  |
| X03Y14    | TGGTCATAAGCTAACTCACATTAATATTGGGC                        | S2 stalk / bridge (via S3 stalk) |
| X03Y15    | GCCAGGGTCCCAGCAGCGGAAAATAGTCCACT                        |                                  |
| X03Y16    | ATTAAGAGTGCCTGAAAGCACTA                                 |                                  |
| X04Y01    | AGTGAGAAATCTAAAGTTTTGTGCCACCCTCAGAGCC                   |                                  |
| X04Y02    | GGGAGTTAAACAGCTTGATACCTCAGCGG                           |                                  |
| X04Y03 S1 | TTATACCAAATACGTAATGCCACGCTTGATTGAGAGCAGACCTGGAACCTCG    |                                  |
| X04Y04    | CCGGATATACCAACTTTGAAAGACCAGCGA                          |                                  |
| X04Y05 S1 | ACAACATTTACCTTATGCGATTACAAGAATTGAGAGCAGACCTGGAACCTCG    |                                  |
| X04Y06    | CGTCCAATACGACGATAAAAACCTAACGGA                          |                                  |
| X04Y07 S1 | AAACTCCAATTGCATCAAAAAGATGGATAGTTGAGAGCAGACCTGGAACCTCG   |                                  |
| X04Y08    | CGCAAATGTACGGTGTCTGGAAGCGGAAGC                          |                                  |
| X04Y09 S1 | TTTCAACGAAGCAATAAAGCCTCTACATTTTGGAGAGCAGACCTGGAACCTCG   |                                  |
| X04Y10    | GCAAAACAAGTTCTAGCTGATAAAGCCTTTA                         |                                  |
| X04Y11 S1 | CCTGTAGCTGTTAAAATTCGCATGTCTGGATTGAGAGCAGACCTGGAACCTCG   |                                  |
| X04Y12    | CCAGGCAATGCCAGTTTGAGGGGTGGCCTT                          |                                  |
| X04Y13 S1 | CTCGAATTTTTCCAGTACAGACCCGAAAATTGAGAGCAGACCTGGAACCTCG    |                                  |
| X04Y14    | GGTTTGCGTTGCGTTGCGCTCACTACCGAG                          |                                  |
| X04Y15 S1 | GGAACAAGCCTGTTTGTGTTGGGAGAGGCTTGAGAGCAGACCTGGAACCTCG    |                                  |
| X04Y16    | AATCGGAACCCTAAACCAGTTT                                  |                                  |
| X05Y01    | CGCCACCCTCAGAACCGTCTTTCCAGACGTTAACAACCTTT               |                                  |
| X05Y02    | CAACAGTTGATAGTTGCGCCGACAATATTCGG                        |                                  |
| X05Y03    | TCGCTGAGTACGAAGGCACCAACCCACTCATC                        | S2 stalk                         |
| X05Y04    | TTTGACCCGGACAGATGAACGGTGATCAAGAG                        |                                  |
| X05Y05    | TAATCTTGTAAAGAACTGGCTCATTTCGTTAATA                      | S2 stalk                         |
| X05Y06    | AAACGAACAAAAATAGCGAGAGGCTAGTAAAAT                       |                                  |
| X05Y07    | GTTTAGACTTAAGAGGAAGCCGATCAAAGCG                         | S2 stalk                         |
| X05Y08    | AACCAGACTTTCATTCCATATAACTAGTTTGA                        |                                  |
| X05Y09    | CCATTAGAAGAGCATAAAGCTAAATACTTTTG                        | S2 stalk                         |
| X05Y10    | CGGGAGAATTAATGCCGAGAGGGGAGGTCATT                        |                                  |
| X05Y11    | GCCTGAGATAAAATTTTGTAAATAAAAAATAA                        | S2 stalk                         |
| X05Y12    | TTCCGCTCACGACGACAGTATCGGGGCACCGC                        |                                  |
| X05Y13    | TTCTGGTGGTTGTAAACGACGCGCTAGAGGA                         | S2 stalk                         |
| X05Y14    | TCCCCGGGTGCCCGCTTTCCAGTCTCGGCCAA                        |                                  |
| X05Y15    | CGCGCGGTTCCGAAATCGGCAAAAGGTTGA                          | S2 stalk                         |
| X05Y16    | GTGTTGTTGGGAGCCCCGATTTA                                 |                                  |
| X06Y01    | TGGTAATAAGTGCCCGTATAAACAAGGTGTATCACCGTAC                |                                  |
| X06Y02    | CTCAGAACC GCCACCAGAACCACCGAGTGTAC                       |                                  |
| X06Y03 S1 | CATTACCACCATCGATAGCAGCACCCGCCACCTTGAGAGCAGACCTGGAACCTCG |                                  |
| X06Y04    | ACATATAATATTTGTACAATCAAGTAGCAC                          |                                  |
| X06Y05 S1 | TTGAGTTAATAGCAATAGCTATCTAGGTGGCATTGAGAGCAGACCTGGAACCTCG |                                  |

|           |                                                         |                                  |
|-----------|---------------------------------------------------------|----------------------------------|
| X06Y06    | CAGAGCCTTTATTTATCCCAATCCACAAGAA                         |                                  |
| X06Y07 S1 | ACAAGCAAACCGCGCCAATAGCACGTCTTTCTTGAGAGCAGACCTGGAACCTCG  |                                  |
| X06Y08    | AGTACCGAGACAATAAACACATGCATCGAGA                         |                                  |
| X06Y09 S1 | TGAAATACGAATAAACACCGGAATGAATATAATTGAGAGCAGACCTGGAACCTCG |                                  |
| X06Y10    | AAAACATAGTCAATAGTGAATTTATAATGGTT                        |                                  |
| X06Y11 S1 | TACCAAGTTTCAATTACCTGAGCAAATCCTTGTTGAGAGCAGACCTGGAACCTCG |                                  |
| X06Y12    | CTGATTATGATTGTTGGATTATAGCTTTGAA                         |                                  |
| X06Y13 S1 | GAAGTTAAATAGATTAGACCGTTCATATTCTTGAGAGCAGACCTGGAACCTCG   |                                  |
| X06Y14    | ACTGATAGCGAACACCAGCAGAAGAATTGAG                         |                                  |
| X06Y15 S1 | ACCGCAGTACCTACATTTTGACGATGCGCGATTGAGAGCAGACCTGGAACCTCG  |                                  |
| X06Y16    | AGGAACGGTACGCCAGACAATATT                                |                                  |
| X07Y01    | AAGTATAGCCCGGAATGTTAATGCCCCCTGCCGCTTTTGA                |                                  |
| X07Y02    | TGATACAGACCAGAGCCGCCCAACCGCCTC                          |                                  |
| X07Y03    | CCTCAGAGCGTAATCAGTAGCGACAGCCAGCA                        | S2 stalk                         |
| X07Y04    | AAATCACCATAGAAAATTCATATGGAAAATAC                        |                                  |
| X07Y05    | ATACATAATACCGAAGCCCTTTTTATCAGAG                         | S2 stalk                         |
| X07Y06    | AGATAACCAAATAAGAAACGATTTTACCAACG                        |                                  |
| X07Y07    | CTAACGAGAGCAAATCAGATAGAACCAAGT                          | S2 stalk                         |
| X07Y08    | ACCGCACTTTTACGCTAATGCAGAACGAGCCAG                       |                                  |
| X07Y09    | TAATAAGACATAATTAAGTAAATCTTCTGA                          | S2 stalk                         |
| X07Y10    | CCTAAATTTCAAATCATAGGCTATTAATTT                          |                                  |
| X07Y11    | TCCCTTAGAAAGAAGATGATGAAAACGGATTC                        | S2 stalk                         |
| X07Y12    | GCCTGATTCTTCTGAATAATGGAAAGGAGCGG                        |                                  |
| X07Y13    | AATTATCACAATAGATAATACATTAATCAACA                        | S2 stalk                         |
| X07Y14    | GTTGAAAGGATAAAAACAGAGGTGATGGCTATT                       |                                  |
| X07Y15    | AGTCTTTACTCAATCGTCTGAAATGCTGGTAA                        | S2 stalk                         |
| X07Y16    | TATCCAGAAATCCTGAGAAGTGTT                                |                                  |
| X08Y01    | CATACATGATTTTCGGAACCTATCGAGAGGGTTGATAT                  |                                  |
| X08Y02 S1 | CCACCGGAGCATTGACAGGAGGTTAAGCGTTTGAGAGCAGACCTGGAACCTCG   |                                  |
| X08Y03    | GGAATTAGAGAATCAAGTTTGCCAGAGCCA                          |                                  |
| X08Y04 S1 | CAAACGTAGTTTACCAGCGCCAACCATTTGTTGAGAGCAGACCTGGAACCTCG   |                                  |
| X08Y05    | AGCGCTAAAAGAAAAGTAAGCAGATGTTAG                          |                                  |
| X08Y06 S1 | CTGAATCTTTTGTAAACGTCAGTAATTGTTGAGAGCAGACCTGGAACCTCG     |                                  |
| X08Y07    | GGGTATTAAGGCTTATCCGGTATTTTATC                           |                                  |
| X08Y08 S1 | GGCATTTTCGCGCCTGTTTATCACAAGAAGTTGAGAGCAGACCTGGAACCTCG   |                                  |
| X08Y09    | TAATTTCAAGCCTGTTTATGATCAGGCAGA                          |                                  |
| X08Y10 S1 | CGCTATTAGAGAGACTACCTTTTTTTTGTGTTGAGAGCAGACCTGGAACCTCG   |                                  |
| X08Y11    | AAACAATACAAACATCAAGAAAAAATCGT                           |                                  |
| X08Y12 S1 | CCACCAGAGGGTTAGAACCTACCTCGGGAGTTGAGAGCAGACCTGGAACCTCG   |                                  |
| X08Y13    | AGTTGGCATGAGGATTTAGAAGTAAAGAAA                          |                                  |
| X08Y14 S1 | TTTTTGAAGGCGGTCAGTATTAATCTGGTCTTGAGAGCAGACCTGGAACCTCG   |                                  |
| X08Y15    | TCGGCCTTGGATTATTTACATTGGACAATA                          |                                  |
| X08Y16    | TTTATAATCAGTGAGCAAATA                                   |                                  |
| X09Y01    | GGCGGATAAGTGCCGTTATTTCTGAAACATGAAGAATTTAC               |                                  |
| X09Y02    | CGTTCCAGTGAGGCAGGTCAGACGCAAAATCA                        | S2 stalk / bridge (via S3 stalk) |
| X09Y03    | CCGGAACCTTTAGCGTCAGACTGTCCGTCACC                        |                                  |
| X09Y04    | GACTTGAGAGACAAAAGGGCGACACTCCTTAT                        | S2 stalk                         |
| X09Y05    | TACGCAGTATAGCCGAACAAAGTTTGAACAAA                        |                                  |
| X09Y06    | GTCAGAGGAAATGAAAATAGCAGCTTGCACCC                        | S2 stalk                         |
| X09Y07    | AGCTACAATTCTAAGAACGCGAGCTTTTCT                          |                                  |
| X09Y08    | TATCATTACAATAGATAAGTCTCCTGCCAACA                        | S2 stalk / bridge (via S3 stalk) |
| X09Y09    | TGTAATTTATATGCGTTATACAAAAACTTTTT                        |                                  |
| X09Y10    | CAAATATATAACCTCCGGCTTAGGATAACCTT                        | S2 stalk                         |
| X09Y11    | GCTTCTGTCAAAATTAATTACATTAACAGTAC                        |                                  |
| X09Y12    | CTTTTACAATATCAAAATTTTGTATCATTT                          | S2 stalk                         |
| X09Y13    | TGCGGAACATTAGACTTTACAAACAAACCCTC                        |                                  |
| X09Y14    | AATCAATACACCGCCTGCAACAGTAAGAATAC                        | S2 stalk / bridge (via S3 stalk) |
| X09Y15    | GTGGCACAGCAGATTACACAGTACCTGAGTA                         |                                  |
| X09Y16    | GAAGAACTGCCACCGAGTAAAGA                                 |                                  |
| X10Y01    | CAGTCTCTAGTATTAAGAGGCTGAGTTTTGCTCAGTACCA                |                                  |

|                         |                                   |  |
|-------------------------|-----------------------------------|--|
| X10Y02                  | TTCATAATATTGGCCTTGATATTCGGAAAGCG  |  |
| X10Y03                  | AATTATCAAGCGCGTTTTTCATCGGGCCATCTT |  |
| X10Y04                  | GATTAAGATTCAACCGATTGAGGGTAAAGGTG  |  |
| X10Y05                  | GAACACCCACCAGAAGGAAACCGAACTGGCAT  |  |
| X10Y06                  | TTGCTATTCTTTACAGAGAGAATAAATTAAC   |  |
| X10Y07                  | ATCGGCTGCGTTTTAGCGAACCTCAAGATTAG  |  |
| X10Y08                  | TTTAACAAGAACAAGAAAAATAATAATCAATA  |  |
| X10Y09                  | CGCGAGAATTCTTACCAGTATAAATCGCCATA  |  |
| X10Y10                  | GTGAGTGATTGGGTTATATAACTAACAAAGAA  |  |
| X10Y11                  | TATACAGTTAACAATTTCAATTTGACAATATAT |  |
| X10Y12                  | AGTAACATCACGTAAAACAGAAATCAGATGAA  |  |
| X10Y13                  | CAAATATCAATTCGACAACCTCGTAAAAGTTTG |  |
| X10Y14                  | GAAAGCGTGCCACGCTGAGAGCCACTGAACCT  |  |
| X10Y15                  | ATCACTTGACGACCGAGTAATAAATCTGACCT  |  |
| X10Y16                  | GTCTGTCCATCACGCAGTAATAAC          |  |
| S1-complementary-biotin | biotin-CGAGTTCCAGGTCTGCTCTC       |  |
| S2 stalk                | staples - TTCAGTCAGTCAGTCAGTCAGT  |  |
| S3 stalk                | staples - TTGTCTCGTCGTCTACCGCAAT  |  |
